# Supplementary material for: Epidemiology of malaria in a village in the Rufiji River Delta, Tanzania: declining transmission over 25 years revealed by different parasitological metrics
Source: PubMed Central journal article supplement (PMC4289390; doi:10.1186/1475-2875-13-459), 2014-11-26

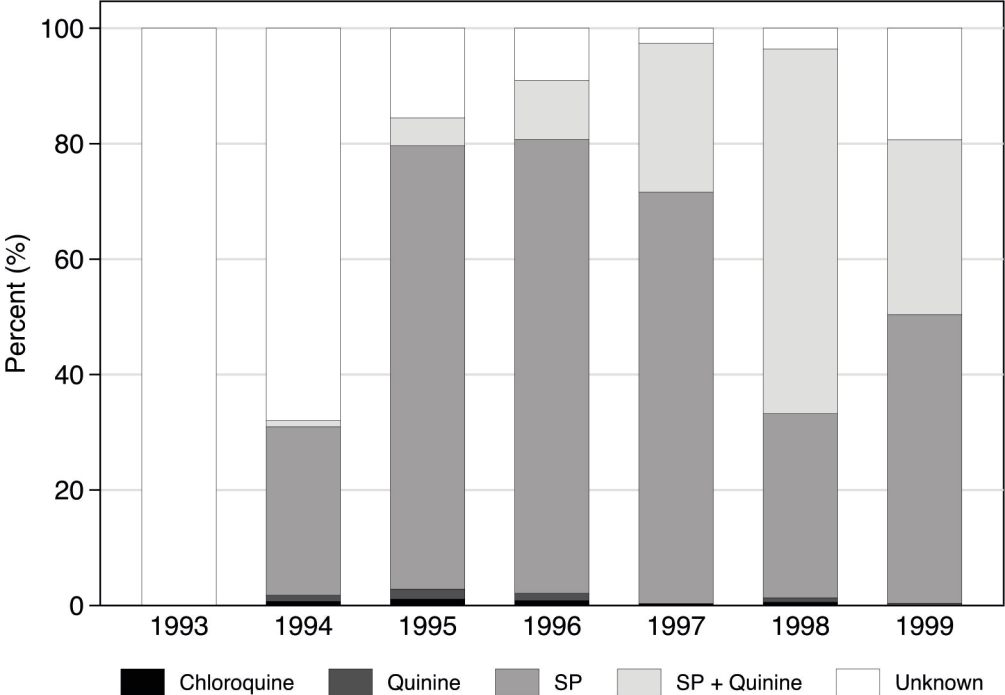

Supplement: 12936_2014_3649_MOESM2_ESM.pdf [file 12936_2014_3649_MOESM2_ESM.pdf]
